# Supplementary material
Source: ML conference proceedings conference paper supplement (https://openreview.net/forum?id=Kuj5gVp5GQ)
Supplement: supplementary_material [file attachment]

## Code Availability Message

Anonymous code is available during the discussion period upon request. We will release the code via a public repository after the decision date.
